# Supplementary material for: Optimised transcranial direct current stimulation (tDCS) for fibromyalgia—targeting the endogenous pain control system: a randomised, double-blind, factorial clinical trial protocol
Source: PubMed Central journal article supplement — BMJ Open. 2019 Oct 30;9(10):e032710. doi: 10.1136/bmjopen-2019-032710 (PMC6830717; doi:10.1136/bmjopen-2019-032710), 2019-10-30
Supplement: bmjopen-2019-032710.reviewer_comments.pdf [file bmjopen-2019-032710.reviewer_comments.pdf]

## PEER REVIEW HISTORY

BMJ Open publishes all reviews undertaken for accepted manuscripts. Reviewers are asked to complete a checklist review form (<http://bmjopen.bmj.com/site/about/resources/checklist.pdf>) and are provided with free text boxes to elaborate on their assessment. These free text comments are reproduced below.

## ARTICLE DETAILS

|                            |                                                                                                                                                                                                                                                                                                                                         |
|----------------------------|-----------------------------------------------------------------------------------------------------------------------------------------------------------------------------------------------------------------------------------------------------------------------------------------------------------------------------------------|
| <b>TITLE (PROVISIONAL)</b> | Optimized transcranial direct current stimulation (tDCS) for fibromyalgia – targeting the endogenous pain control system: A randomized, double-blind, factorial clinical trial protocol                                                                                                                                                 |
| <b>AUTHORS</b>             | Castelo-Branco, Luis; Uygur Kucukseymen, Elif; Duarte, Dante; El-Hagrassy, Mirret; Bonin Pinto, Camila; Gunduz, Muhammed Enes; Cardenas, Alejandra; Pacheco Barrios, Kevin; Yang, Yiling; Gonzalez-Mego, Paola; Estudillo-Guerra, Anayali; Candido-Santos, Ludmilla; Mesia-Toledo, Ines; Rafferty, Haley; Caumo, Wolnei; Fregni, Felipe |

This article was not externally reviewed at BMJ Open. Protocols that have been independently assessed prior to submission to BMJ Open are usually fast-tracked to publication on the grounds that further substantial changes will not be possible. This independent assessment will usually be external, independent review for both a substantial grant award from a non-commercial or government funder and ethics approval.
