# Supplementary material for: Optimised transcranial direct current stimulation (tDCS) for fibromyalgia—targeting the endogenous pain control system: a randomised, double-blind, factorial clinical trial protocol
Source: PubMed Central journal article supplement — BMJ Open. 2019 Oct 30;9(10):e032710. doi: 10.1136/bmjopen-2019-032710 (PMC6830717; doi:10.1136/bmjopen-2019-032710), 2019-10-30
Supplement: bmjopen-2019-032710supp001.pdf [file bmjopen-2019-032710supp001.pdf]

| Trial registration dataset                    |                                                                                                                                                                                                                                                                                                                                                                                                                                                                                                                                                                                                                                                                                                                                                                |
|-----------------------------------------------|----------------------------------------------------------------------------------------------------------------------------------------------------------------------------------------------------------------------------------------------------------------------------------------------------------------------------------------------------------------------------------------------------------------------------------------------------------------------------------------------------------------------------------------------------------------------------------------------------------------------------------------------------------------------------------------------------------------------------------------------------------------|
| Data Category                                 | Information                                                                                                                                                                                                                                                                                                                                                                                                                                                                                                                                                                                                                                                                                                                                                    |
| Primary registry and trial identifying number | ClinicalTrials.gov<br>NCT03371225                                                                                                                                                                                                                                                                                                                                                                                                                                                                                                                                                                                                                                                                                                                              |
| Date of registration in primary registry      | December 13, 2017                                                                                                                                                                                                                                                                                                                                                                                                                                                                                                                                                                                                                                                                                                                                              |
| Secondary identifying numbers                 | 2017P002524                                                                                                                                                                                                                                                                                                                                                                                                                                                                                                                                                                                                                                                                                                                                                    |
| Source of monetary or material support        | National Institutes of Health (NIH)                                                                                                                                                                                                                                                                                                                                                                                                                                                                                                                                                                                                                                                                                                                            |
| Primary sponsor                               | National Institutes of Health (NIH)                                                                                                                                                                                                                                                                                                                                                                                                                                                                                                                                                                                                                                                                                                                            |
| Contact for public queries                    | Felipe Fregni, MD, PhD, MPh, MMSc                                                                                                                                                                                                                                                                                                                                                                                                                                                                                                                                                                                                                                                                                                                              |
| Contact for scientific queries                | Felipe Fregni, MD, PhD, MPh, MMSc                                                                                                                                                                                                                                                                                                                                                                                                                                                                                                                                                                                                                                                                                                                              |
| Public title                                  | Optimized tDCS for fibromyalgia: targeting the endogenous pain control system                                                                                                                                                                                                                                                                                                                                                                                                                                                                                                                                                                                                                                                                                  |
| Scientific title                              | Optimized tDCS for fibromyalgia – targeting the endogenous pain control system: A randomized, double-blind, factorial clinical trial protocol                                                                                                                                                                                                                                                                                                                                                                                                                                                                                                                                                                                                                  |
| Countries of recruitment                      | United States                                                                                                                                                                                                                                                                                                                                                                                                                                                                                                                                                                                                                                                                                                                                                  |
| Health condition(s) or problem(s) studies     | Fibromyalgia                                                                                                                                                                                                                                                                                                                                                                                                                                                                                                                                                                                                                                                                                                                                                   |
| Interventions                                 | Device: Active tDCS; Procedure: Active Exercise;<br>Device: Sham tDCS; Procedure: Sham Exercise                                                                                                                                                                                                                                                                                                                                                                                                                                                                                                                                                                                                                                                                |
| Key inclusion and exclusion criteria          | <p><b><u>Inclusion criteria:</u></b></p> <p>1) 18-65 years; 2) Diagnosis of FM pain according to the ACR 2010 criteria; 3) Pain resistant to common analgesics and medications for chronic pain; 4) Must have the ability to feel sensation by Von-Frey fiber on the forearm; 5) Able to provide informed consent to participate in the study.</p> <p><b><u>Exclusion criteria:</u></b></p> <p>1) Clinically significant or unstable medical or psychiatric disorder; 2) History of substance abuse within the past 6 months as self-reported; 3) Previous significant neurological history; 4) Previous neurosurgical procedure with craniotomy; 5) Severe depression; 6) Pregnancy; 7) Current opiate use in large doses; 8) increased risk for exercise</p> |

|                         |                                                                                                                                                                                                                                                                                                                                                                                                                                                                              |
|-------------------------|------------------------------------------------------------------------------------------------------------------------------------------------------------------------------------------------------------------------------------------------------------------------------------------------------------------------------------------------------------------------------------------------------------------------------------------------------------------------------|
| Study type              | Interventional                                                                                                                                                                                                                                                                                                                                                                                                                                                               |
|                         | Randomized, double-blind, factorial clinical trial                                                                                                                                                                                                                                                                                                                                                                                                                           |
| Date of first enrolment | May 2019                                                                                                                                                                                                                                                                                                                                                                                                                                                                     |
| Target sample size      | 148                                                                                                                                                                                                                                                                                                                                                                                                                                                                          |
| Recruitment status      | Recruiting                                                                                                                                                                                                                                                                                                                                                                                                                                                                   |
| Primary outcome(s)      | Conditioned Pain Modulation (CPM); Temporal Slow Pain Summation (TSPS)                                                                                                                                                                                                                                                                                                                                                                                                       |
| Key secondary outcomes  | Intracortical inhibition assessed by TMS; thalamocortical dysrhythmia (TCD) and event related desynchronization (ERD) assessed by EEG; Average pain intensity as assessed by Modified Brief Pain Inventory (BPI); Revised Fibromyalgia Impact Questionnaire (FIQ-R); Quality of life assessed by Quality of Life Scale (QoLS), Patient Reported Outcomes Measurement Information System (PROMIS); Pittsburgh Sleep Quality Index (PSQI) and Beck Depression Inventory (BDI). |

**Protocol Version:**

Issue date: 05/16/2019

Protocol amendment number: 08

**Revision Chronology**

18/01/2018: Original submission

08/23/2018: Amendment 01- Primary reason for amendment: clarification of inclusion/exclusion criteria

11/02/2018: Amendment 04 - Primary reason for amendment: clarification of TMS protocol

16/05/2019: Amendment 08- Primary reason for amendment: clarification of CPM and TSPS procedures

All other Amendments (01, 03, 05, 06, 07) were related to changes in study staff. Any further amendments will follow Partners Healthcare institutional policies.
